# Supplementary material for: Study on the Valuation Method for Overseas Oil and Gas Extraction Based on the Modified Trinomial Tree Option Pricing Model
Source: Hindawi journal article supplement (doi:10.1155/2020/4803909), 2020-05-12
Supplement: f1 [file 4803909.f1.xlsx]

## Sheet: CB_DATA_
Crystal Ball Data
Workbook Variables	Last Var Column	0
Name:
Value:
Worksheet Data	Last Data Column Used
	2
Sheet Ref
#REF!	#REF!
Sheet Guid
2760bea2-3aa7-4870-81d5-1b4d700b6926	3ad61be3-ad83-4074-9eee-fdbca21068b7
Deleted sheet count
Last row used
31	31
Data blocks
CB_Block_0	CB_Block_7.0.0.0:1
㜸〱敤㕣㕢㙣ㅣ㔷ㄹ摥㌳摥㕤敦慣敤搸㡤搳㑢㑡㐹つ愵ㄴ敡攰挶㘹㑤㈹㄰㠲㉦捤愵㜵㘲㌷㜶㔲㄰愰捤㜸昷㑣㍣捤捥㡣㍢㌳敢挴愵㔲愳㔲㙥攲㔲愹㕣㐴愱㐰㔵㈱㈴㕥戸㍣搰㜲改ぢ〸〹㠴㡡挴〳㍣㈰㈱㔴㄰ㄷ㈱㄰㡡〴て㍣㈰挱昷㥤㤹搹㥤㔹㝢挷敥戶〵ㄷ昹愴晢晢捣戹捤㌹攷扦㥥晦㍦搳㥣挸攵㜲晦㐶攲㕦愶㍣㌳搷㉤慣昹㠱戴挷愶摤㝡㕤㔶〳换㜵晣戱㐹捦㌳搶㘶㉤㍦攸㐱㠳㘲挵㐲扤㕦愸昸搶〳戲㔴㔹㤵㥥㡦㐶㠵㕣慥㔴搲㌵搴㜳㄰晥㠶攲〷㥤扤晡昳〰㡢搳㔳㜳㑢昷㘱搴㠵挰昵攴晥㤱㌳㘱摦㐳攳攳㘳攳㘳户㑤㡣ㅦㅣ㍢戰㝦㘴扡㔱てㅡ㥥㍣攴挸㐶攰ㄹ昵晤㈳昳㡤愵扡㔵扤㕢慥㉤扡攷愵㜳㐸㉥ㅤ戸㜵挹戸敤㉤攳户㑤㑣㤸㜷摣昱㤶㝥扣㍡㜷㜲㝡㙡摥㤳愶晦ㄲ㡤㔹攰㤴㙦㥢㤱㔵㡢㙢㤳搲戳㥣㜳㘳搳㔳昸㉦㌱㝦㍣摤㍥戶戰㉣㘵挰㔷㑢㑦㍡㔵改敢攸搸㘷㑦晡㝥挳㕥攱收改昶ㄱ㉣戵㙡昸㐱挱㥥㤶昵扡㙥挷愳㤶散㌹散㕤摤㔸敢户ㄷ愴攳㕢㠱戵㙡〵㙢㐵㝢ㄱ〳搵〶散搳扥㍣㘵㌸攷攴㐹挳㤶〵晢㘸挳慡攵挳㤴敢戹㈹ㅥ㈲㌹㌱戵晣…	㜸〱敤㕣㝢㜴搴搵㥤㥦㍢挹晣㌲㜷㤲㤰攱㔹ㄱ挱㈸㔰挱㐰㑣〲〸愸㤸㠴㠴㐷㌴㍣〳㙡ㄵつ㤳㤹摦㤰㤱㜹挴㤹〹㈴㉥㉡慥㈰攰愳戵搴㍤㝤㐸㝤搶搵㕡㙤㝢昶ㅣ㉢摤㔲㝢㙡摤㔳户戵扢慤昵戴㜶捦㥥㙥㙢〱㜵戵㤵扡摢ㅥ敡愹扡㥦捦昷昷㥢㤹摦扣ㄲ㐴㍣换ㅦ扤㘴扥昳扤摦晢扤慦敦晤摥㝢扦昷㝢敦攰㔲㉥㤷敢〳〴㝥㌳㔴ㄲ㌹慢㘷㌸㤵㌶㘳㡤ㅤ㠹㘸搴っ愶㈳㠹㜸慡戱㍤㤹っっ㜷㐷㔲改ち㌰ㄸ扤ㄱ愴愷㍣扤愹挸㡤愶户㜷㥢㤹㑣㠱挹攳㜲㜹扤摡㡤昴㉡晢攳捦㐴㌴㜳改㑡〲㜰戹戴㐱㐰㉥敤㈵搰〰㌵㍥㠰つㅤ㑢搷昴㕤㡦㍡㝢搲㠹愴㌹愷晥ち慢攴㈵捤捤㡤捤㡤昳ㄷ㌴户㌴㌶捤愹敦ㄸ㡣愶〷㤳收㤲戸㌹㤸㑥〶愲㜳敡搷づ昶㐵㈳挱换捤攱つ㠹慤㘶㝣㠹搹搷㌴慦㉦㌰㝦㔱昳晣〵ぢ挲㡢ㄷ㉦慡愹㐶挹慢㍢㤶慥㑤㥡攱搴愹㉡戳㠶㘵慥改㔸摡戸摡㑣㥦慡㌲㙢㔱㈶㡡散㑣挴〲㤱昸㈹㉡搴㐳挹㉦攸㌴㠳ㄱづ㤱㘹㈶㈳昱㉤㡤㘸㜶㥥愰ㄱ㕢搸搸㥥㑡つ挶〶㌸摡ㅤ㘶㌴扡摥っ换搰挴㍡㔳改戵㠱㘴㉣㔵ㄳ愳晣捣愴ㄹて㥡愹㌱戱㘵㐳㐱㌳㙡㌳愶扣…
Decisioneering:7.0.0.0	Decisioneering:7.0.0.0
CB_Block_7.0.0.0:1	CB_Block_0
㜸〱捤㔸摤㙦ㅢ㐵㄰昷㥤㝤攷㍢㝦㈴敥㘷㘸㕡㕡㔳㑡㍦㐸㘵敡㈶㔱扦㔴戵戱摤㝣㠸㌶㐹㙢户㝤㐲挷搹户ㄷ㕦㜳ㅦ㘶敦㥣挴攵㠵㡦㑡愸昰挰ㄳㄲ㠵愲ち㈴愰㐲〲㈱㕥㤰㉡搱扥昳〸昴て㐰㌴㈹〸㥥晢㠶㘰㘶捦㑥㙣挷愱㘹㕡愴㙥攲扤摢㥤摤搹摤搹㤹摦捣㕣㠰ぢ〴〲晦㐰挱㈷㤶㄰扥㙣换搷㕣㡦㔸愹慣㘳㥡愴攴ㄹ㡥敤愶㠶㈸㔵㙢愷つ搷ぢ挲〰㔱㌱㠰敥ち㡡㙢㕣㈶㤲㌲㐳愸ぢ㠳㠴㐰㐰㤲㘴ㅥ攸挸〴㝦㠹㐶㐳挶㔹戱㄰㔴㠵㙣㘶愲㜸〹戸收㍤㠷㤲晤挹ぢ晥摣攳改㜴㉡㥤ㅡㄸ㑣ㅦ㑣ㅤ搸㥦捣㔶㑤慦㑡挹㜱㥢㔴㍤慡㥡晢㤳㤳搵愲㘹㤴㕥㈶戵㠲㌳㑤散攳愴㜸愰扦愸づㅣ㑥てっづ敡㐷㡥ㅣ㡥挱搲㠱挹㙣㘶㤴㤸ㄵ攰昷愴戸㡡挰㜵㍣㥢㤹愴㐴㝦㔲㍣〵ㄴ㐴㍡㐷㑡〶㑡㡣㄰㙡搸㔳愹㙣〶晥㥢愴〲慤㐳愹㠹㝣㥥搸慥攱ㄹ㌳㠶㔷挳昳挹搶㐴愹㜸㐱㌵慢㐴戴搸㤶㈴敢㠲㑡挷㔵㡢挴慤昳㉥㌹愷摡㔳〴㕢㠲㌵㔲㌵戴㄰摣㘴㜰㕦愷㠵敡㐲㑡㑤㘴㌳搹戲㑡㍤挶ㄲㄷ㜸愹搳㘸戶㔲慡㘹㉢㙣づ敢㐵昱㜰搱扡慥戰㌵㜱㤷㘱慣㈴愸㐴ㄹ慡慥㠵て摥㕦戸…	㜸〱敤㕣㕢㙣㈴㔷㤹敥㔳敥㙥㜷戵敤戱㌳㥥㕣㈶〹㠹㈱㠴㐰㍣敢㡣㈷ㄹ㐲㠰搹挱㤷捣㈵昱㡣㥤戱㘷〲㘲㔱㑦戹晢搴戸㌲㜵㜱慡慡㍤攳㄰㈹㈳㌶摣挴㈵㔲戸㠸㐰戸㈸㐲㐸〸㠹㡢㔶换㌵㉦㐸〸㄰ちㄲて昰㠰戴て㔹戴换㙡戵㉢㌴ㄲ㉦㍣㈰挱昷㥤慡敡慥㙡扢换㑥㈷〱〷昹㑣晡昷愹㜳慢㜳捥㝦㍤晦㝦㉡〵㔱㈸ㄴ晥㠲挴扦㑣㐵㘶㙥㕥㕣て㐲改㑣捣㜸戶㉤敢愱攵戹挱挴㤴敦ㅢ敢㜳㔶㄰昶愱㐱戹㘶愱㍥㈸搵〲敢㌱㔹愹慤㐹㍦㐰愳㔲愱㔰愹攸ㅡ敡㌹〸㝦㈳挹㠳捥㕥㠳㐵㠰愵㤹改昹攵㐷㌰敡㘲攸昹昲挰搸戹愸敦㤱挹挹㠹挹㠹㝢づ㑦ㅥ㥡㌸㜸㘰㙣愶㘹㠷㑤㕦ㅥ㜱㘵㌳昴つ晢挰搸㐲㜳搹戶敡て捡昵㈵敦愲㜴㡦挸攵㠳㜷㉦ㅢ昷扣㙤昲㥥挳㠷捤晢敥㝢摢㈰㕥㕤㌸㍤㌳扤攰㑢㌳㜸㠵挶㉣㜱捡昷捣捡扡挵戵㐹改㕢敥㠵㠹㤹㘹晣㤷㥡㍦㥥敥㥤㔸㕣㤱㌲攴慢愵㉦摤扡っ㜴㜴ㅣ㜰愶㠲愰改慣㜲昳㜴攷ㄸ㤶㕡㌷㠲戰攴捣㐸摢搶㥤㘴搴㡡㌳㡦扤戳㡤昵㐱㘷㔱扡㠱ㄵ㕡㙢㔶戸㕥㜶㤶㌰㔰㘳挸㌹ㅢ挸㌳㠶㝢㐱㥥㌶ㅣ㔹㜲㡥㌷慤㐶㌱㑡㠵扥㍢㤲㈱…
Decisioneering:7.0.0.0	Decisioneering:7.0.0.0

## Sheet: Sheet1
		Uncertainty factor	Distribution of affected parameters
		资源储量	Ln（Rpre） ~ N（9,0.422）	6000
		国际油价	dLn Ps-price=0.8(4-Ln Ps-price )dt+0.02dzt，dzt~（0，dt）
		资源深度	Idev/bbl ~ N（16,3.22）	16
		资源品质	iqua ~ N（4,0.782）	4
		动用率	ruti ~ Tra(0.8,0.85,0.94,1)	0.85
		采油速度	rpro­ ~ Tri(0.01,0.02,0.03)	0.02
		递减率	rlap ~ Tri(0.15,0.2,0.22)	0.2
		风险贴水率	i ~ 0.01T（4）+0.1								total	对数	均值	方差		油价	运营	税	净价格	净收入	折现率		勘探	开发	建设投资	451.249	c1	451.249
							2022	34			34	3.52636	3.75	0.46		48.5391	17	6.30782	25.2313	857.864	0.729	625.383	393.66			751.249	c2	751.249
							2023	27.2	34		61.2	4.11415	4.26	0.24		55.1503	17	7.63006	30.5203	1867.84	0.6561	1225.49	3542.94			1144.91	c3
							2024	21.76	27.2	34	82.96	4.41836	4.52	0.15		80.6151	17	12.723	50.8921	4222.01	0.59049	2493.05		2380.96	1224.68	4687.85	c4
							2025	17.408	21.76	27.2	66.368	4.19522	4.3	0.16		113.152	17	19.2304	76.9217	5105.14	0.531441	2713.08		2142.86	1102.21	8293.49	c5
							2026	13.9264	17.408	21.76	53.0944	3.97207	4.08	0.16		110.035	17	18.6071	74.4282	3951.72	0.478297	1890.1
							2027	11.1411	13.9264	17.408	42.4755	3.74893	3.84	0.16		71.8938	17	10.9788	43.915	1865.31	0.430467	802.956
							2028	8.9129	11.1411	13.9264	33.9804	3.52578	3.64	0.17		62.6353	17	9.12707	36.5083	1240.57	0.38742	480.621
							2029	7.13032	8.9129	11.1411	27.1843	3.30264	3.42	0.17		59.2827	17	8.45653	33.8261	919.541	0.348678	320.624
							2030	5.70425	7.13032	8.9129	21.7475	3.0795	3.2	0.17		50.3412	17	6.66824	26.673	580.069	0.313811	182.032
							2031	4.5634	5.70425	7.13032	17.398	2.85635	2.99	0.18		69.1994	17	10.4399	41.7595	726.531	0.28243	205.194
							2032	3.65072	4.5634	5.70425	13.9184	2.63321	2.77	0.18		68.2444	17	10.2489	40.9955	570.591	0.254187	145.037
							2033	2.92058	3.65072	4.5634	11.1347	2.41007	2.55	0.18		59.7694	17	8.55389	34.2155	380.98	0.228768	87.156
							2034	2.33646	2.92058	3.65072	8.90776	2.18692	2.33	0.19		75.9413	17	11.7883	47.1531	420.028	0.205891	86.4801
							2035	1.86917	2.33646	2.92058	7.12621	1.96378	2.12	0.19		105.784	17	17.7568	71.0274	506.156	0.185302	93.7917
							2036	1.49534	1.86917	2.33646	5.70097	1.74064	1.9	0.2		116.671	17	19.9342	79.7366	454.576	0.166772	75.8105
							2037	1.19627	1.49534	1.86917	4.56077	1.51749	1.68	0.2		101.587	17	16.9175	67.6699	308.627	0.150095	46.3233
							2038	0.957015	1.19627	1.49534	3.64862	1.29435	1.46	0.21		76.9104	17	11.9821	47.9283	174.872	0.135085	23.6226
							2039	0.765612	0.957015	1.19627	2.9189	1.07121	1.25	0.21		79.4307	17	12.4861	49.9446	145.783	0.121577	17.7238
							2040	0.61249	0.765612	0.957015	2.33512	0.848062	1.03	0.22		76.6614	17	11.9323	47.7291	111.453	0.109419	12.1951
							2041	0.489992	0.61249	0.765612	1.86809	0.624918	0.81	0.22		70.4345	17	10.6869	42.7476	79.8566	0.0984771	7.86404
							2042	0.391993	0.489992	0.61249	1.49447	0.401775	0.6	0.23		54.9872	17	7.59745	30.3898	45.4168	0.0886294	4.02526
											504.022	6.22262									PV（c5）	11538.6

## Sheet: Sheet2
				一列数	对数
				34	3.52636						48.5391	55.1503	80.6151	113.152	110.035	71.8938	62.6353	59.2827	50.3412	69.1994	68.2444	59.7694	75.9413	105.784	116.671	101.587	76.9104	79.4307	76.6614	70.4345	54.9872	48.119	43.9083	77.3595	80.2407	48.1398	53.8513	77.3305	70.5301	56.7786
				61.2	4.11415
				82.96	4.41836
				66.368	4.19522
				53.0944	3.97207
				42.4755	3.74893
				33.9804	3.52578						48.5391
				27.1843	3.30264						55.1503
				21.7475	3.0795						80.6151
				17.398	2.85635						113.152
				13.9184	2.63321						110.035
				11.1347	2.41007						71.8938
				8.90776	2.18692						62.6353
				7.12621	1.96378						59.2827
				5.70097	1.74064						50.3412
				4.56077	1.51749						69.1994
				3.64862	1.29435						68.2444
				2.9189	1.07121						59.7694
				2.33512	0.848062						75.9413
				1.86809	0.624918						105.784
				1.49447	0.401775						116.671
			均值	24.0011	2.54437						101.587
											76.9104
											79.4307
											76.6614
											70.4345
											54.9872
											48.119
											43.9083
											77.3595
											80.2407
											48.1398
											53.8513
											77.3305
											70.5301
											56.7786
